# Supplementary material for: Shifts in rotifer life history in response to stable isotope enrichment: testing theories of isotope effects on organismal growth
Source: R Soc Open Sci. 2017 Mar 29;4(3):160810. doi: 10.1098/rsos.160810 (PMC5383824; doi:10.1098/rsos.160810)
Supplement: Table S6. Life table data for Brachiomus plicatilis exposed to 15N-enriched algal food. [file rsos160810supp2.xlsx]

## Sheet: readme
Primary data from the life table experiment with Brachionus plicatilis
- treatments: control, 0.4, 0.5, 1, 3.5 and 5 at% 15N
- endpoints measured:
	- reproperiod (days; difference between the day of death and day of the first reproduction)
	- LTF (life time fecundity; total number offspring produced over the life time)
	- AFR (days; age at first reproduction)
Data are arranged in spreadsheets according to treatment.
Spreadsheets are in the standard form of life tables, with wells (=individuals) in column D, days in the first row and neonates in columns E to AA.

## Sheet: control
Reproperiod	LTF	AFR	well/day	1	2	3	4	5	6	7	8	9	10	11	12	13	14	15	16	17	18	19	20	21	22	23	24
5.5	13	1.5	1	0	1	2	4	3	2	1
5.5	11	1.5	2	0	1	2	3	3	1	1	0
7.5	14	0.5	3	1	1	2	2	3	2	1	2	0
2.5	7	1.5	4	0	2	3	2
6.5	15	1.5	5	0	1	2	4	3	2	2	1	0
7.5	16	1.5	6	0	1	2	2	4	3	2	1	1	0
7.5	16	0.5	7	1	0	2	4	3	2	2	2	0
3.5	10	1.5	8	0	1	2	4	3	0
7.5	16	1.5	9	0	1	2	4	3	2	2	1	1	0
5.5	15	2.5	10	0	0	1	3	4	3	2	2	0
8.5	20	1.5	11	0	1	2	2	4	4	3	2	1	1	0
8.5	20	0.5	12	1	0	2	3	2	3	4	4	1	0
5.5	14	1.5	13	0	1	2	2	4	3	2	0
7.5	20	0.5	14	1	2	3	2	4	4	3	1	0
4.5	12	1.5	15	0	2	4	3	2	1
6.5	15	1.5	16	0	1	2	2	4	4	1	1	0
4.5	15	1.5	17	0	2	2	3	4	4	0
5.5	12	2.5	18	0	0	1	1	3	4	2	1	0
8.5	16	0.5	19	1	1	2	4	3	2	1	1	1	0
6.5	14	0.5	20	1	1	2	4	2	2	2	0
8.5	20	1.5	21	0	1	1	2	4	2	4	3	2	1	0
7.5	20	1.5	22	0	1	2	4	3	4	3	2	1	0
4.5	13	1.5	23	0	2	2	4	3	2	0	0
7.5	19	1.5	24	0	1	2	4	2	4	3	2	1	0
6.375	15.125	1.33333	SUM	6	25	49	72	73	60	41	26	9	2	0	0	0	0
			STDEV	0.442326	0.624094	0.624094	0.978019	0.716822	1.15755	1.11697	1.06513	0.632456	0.46291

## Sheet: 0.4at%
Reproperiod	LTF	AFR	well/day	1	2	3	4	5	6	7	8	9	10	11	12	13	14	15	16	17	18	19	20	21	22	23	24
5.5	10	1.5	1	0	1	2	2	2	2	1
4.5	10	2.5	2	0	0	2	2	3	2	1	0
10.5	17	0.5	3	1	0	1	2	1	2	3	3	2	1	1	0
1.5	4	1.5	4	0	2	2
6.5	12	1.5	5	0	1	2	2	2	2	2	1	0
7.5	13	1.5	6	0	1	2	1	2	3	2	1	1	0
9.5	13	0.5	7	1	0	1	1	2	2	2	2	1	1	0
2.5	5	2.5	8	0	0	2	2	1	0
7.5	12	1.5	9	0	1	2	2	1	2	2	1	1	0
5.5	10	2.5	10	0	0	1	2	1	3	2	1	0
8.5	14	1.5	11	0	1	1	2	2	1	3	2	1	1	0
8.5	14	0.5	12	1	0	2	1	2	3	2	2	1	0
4.5	10	2.5	13	0	0	2	2	1	3	2	0
7.5	12	0.5	14	1	0	1	2	2	2	3	1	0
9.5	15	2.5	15	0	0	1	2	2	2	2	2	2	1	0	1	0
7.5	12	1.5	16	0	1	2	2	2	2	1	1	1	0
6.5	14	1.5	17	0	1	2	2	2	2	3	2	0
11.5	15	2.5	18	0	0	1	1	1	2	2	2	1	2	1	1	0	1
7.5	15	1.5	19	0	1	2	2	2	2	3	2	1	0
5.5	12	0.5	20	1	2	2	2	3	2	0	0
9.5	18	1.5	21	0	1	1	2	2	2	2	3	2	2	1	0
7.5	17	1.5	22	0	1	2	2	2	4	3	2	1	0
4.5	11	2.5	23	0	0	2	2	3	2	2	0
7.5	16	1.5	24	0	1	2	2	2	3	3	2	1	0
6.95833	12.5417	1.58333	SUM	5	15	40	42	43	50	46	30	16	8	3	2	0	1
			STDEV	0.414851	0.646899	0.481543	0.387553	0.625543	0.777652	0.811177	0.92582	0.658653	0.767948	0.547723	0.57735	0

## Sheet: 0.5at%
Reproperiod	LTF	AFR	well/day	1	2	3	4	5	6	7	8	9	10	11	12	13	14	15	16	17	18	19	20	21	22	23	24
11.5	14	1.5	1	0	1	1	2	2	1	1	1	1	1	1	1	1
10.5	14	2.5	2	0	0	1	1	2	1	1	2	1	1	1	2	1	0
12.5	15	1.5	3	0	1	1	2	1	1	2	1	2	1	0	1	1	1	0
8.5	12	2.5	4	0	0	1	2	2	1	2	2	1	0	1
8.5	13	1.5	5	0	1	1	2	1	2	2	1	2	1
11.5	13	1.5	6	0	1	1	2	1	2	1	1	1	0	2	0	1
13.5	16	1.5	7	0	1	1	1	2	2	1	2	1	1	1	1	1	0	1	0
6.5	12	2.5	8	0	0	1	2	2	2	2	2	1	0
9.5	13	1.5	9	0	1	2	2	2	1	2	1	1	0	1
5.5	10	2.5	10	0	0	1	2	2	2	2	1	0
13.5	15	1.5	11	0	1	1	2	1	1	0	2	1	1	2	1	1	0	1	0
4.5	8	0.5	12	1	0	2	3	2
8.5	11	2.5	13	0	0	1	2	1	1	2	0	2	1	1	0
6.5	11	1.5	14	0	1	1	2	2	1	3	1	0
3.5	8	2.5	15	0	0	2	3	2	1
9.5	13	1.5	16	0	1	2	2	2	2	1	1	1	0	1	0
10.5	16	1.5	17	0	1	2	2	2	2	3	2	0	1	0	1
11.5	16	2.5	18	0	0	1	1	3	1	2	2	1	2	1	1	0	1
7.5	12	1.5	19	0	1	2	2	2	2	1	1	1	0
5.5	9	0.5	20	1	0	1	3	2	2	0	0
7.5	15	2.5	21	0	0	1	2	1	2	2	3	2	2	0
4.5	11	1.5	22	0	1	2	2	2	4
3.5	9	2.5	23	0	0	2	2	3	2	0	0
5.5	10	1.5	24	0	1	2	2	2	2	1
8.33333	12.3333	1.79167	SUM	2	13	33	48	44	38	31	26	19	12	12	8	6	2	2	0	0
			STDEV	0.28233	0.508977	0.494535	0.510754	0.56466	0.71406	0.872872	0.801315	0.639137	0.68313	0.640513	0.632456	0.377964	0.547723	0.57735	0

## Sheet: 1at%
Reproperiod	LTF	AFR	well/day	1	2	3	4	5	6	7	8	9	10	11	12	13	14	15	16	17	18	19	20	21	22	23	24
11.5	12	2.5	1	0	0	2	0	1	2	1	2	0	1	0	1	1	1	0
10.5	12	2.5	2	0	0	1	1	1	1	2	2	1	1	1	0	1	0
15.5	17	1.5	3	0	1	1	1	1	1	1	2	1	1	2	1	1	1	0	1	1	0
10.5	15	2.5	4	0	0	1	2	2	3	2	2	1	1	0	0	1
8.5	11	2.5	5	0	0	2	1	1	2	1	1	1	1	1
11.5	15	2.5	6	0	0	2	2	1	0	2	1	2	1	2	0	1	1	0
14.5	18	2.5	7	0	0	1	1	2	2	1	2	1	2	1	1	1	0	1	0	1	0	1	0
1.5	4	2.5	8	0	0	2	2
11.5	11	3.5	9	0	0	0	0	1	2	2	1	1	0	1	1	1	0	1	0
12.5	16	2.5	10	0	0	1	2	1	0	2	1	3	2	1	1	1	0	1	0
14.5	16	2.5	11	0	0	1	2	1	1	0	2	1	1	2	1	1	0	1	0	1	0	1	0
4.5	8	0.5	12	1	0	2	3	2
8.5	11	2.5	13	0	0	1	2	1	1	2	0	2	1	1	0
7.5	11	2.5	14	0	0	1	2	2	1	3	1	0	1	0
3.5	8	2.5	15	0	0	2	2	2	2
15.5	15	2.5	16	0	0	2	2	1	2	1	1	1	0	1	0	1	1	0	1	0	1
8.5	14	3.5	17	0	0	0	2	1	2	3	2	2	1	0	1
14.5	18	2.5	18	0	0	1	1	3	1	2	2	1	2	1	1	0	1	1	0	1
6.5	10	2.5	19	0	0	1	2	2	2	1	1	1	0
8.5	7	0.5	20	1	0	1	0	2	1	0	1	1	0
10.5	14	3.5	21	0	0	0	2	1	1	2	1	1	2	1	1	1	1
3.5	7	1.5	22	0	1	2	2	2
3.5	8	2.5	23	0	0	1	2	3	2	0	0	0
1.5	4	1.5	24	0	2	2
9.125	11.75	2.33333	SUM	2	4	30	36	34	29	28	25	21	18	15	9	11	6	5	2	4	1	2	0	0
			STDEV	0.28233	0.481543	0.675664	0.787752	0.670982	0.759155	0.904828	0.671038	0.737468	0.685994	0.680074	0.497245	0.288675	0.522233	0.527046	0.48795	0.447214	0.5	0	0

## Sheet: 3.5at%
Reproperiod	LTF	AFR	well/day	1	2	3	4	5	6	7	8	9	10	11	12	13	14	15	16	17	18	19	20	21	22	23	24
8.5	15	1.5	1	0	1	2	0	1	2	3	2	3	1	0
8.5	19	2.5	2	0	0	1	1	3	2	3	2	3	3	1	0
12.5	18	1.5	3	0	1	1	2	1	2	2	1	2	1	2	1	1	1	0
7.5	15	1.5	4	0	1	1	2	2	3	2	2	2	0
7.5	11	1.5	5	0	1	2	1	2	1	1	2	1
10.5	16	2.5	6	0	0	2	2	2	1	2	1	2	1	2	0	1	0
11.5	18	1.5	7	0	2	2	2	1	2	1	1	2	2	1	1	1	0
3.5	9	1.5	8	0	2	2	3	2
9.5	17	2.5	9	0	0	1	2	2	2	2	2	2	2	1	1	0
10.5	16	1.5	10	0	2	1	2	1	2	2	1	1	2	1	1	0
7.5	14	2.5	11	0	0	1	2	1	3	2	2	2	1	0
6.5	11	0.5	12	1	1	2	1	2	2	2
8.5	15	1.5	13	0	1	1	2	1	3	2	2	2	1	0
7.5	14	1.5	14	0	1	1	2	3	1	2	2	2	0
6.5	12	0.5	15	1	1	1	2	2	3	2	0
9.5	18	1.5	16	0	1	2	2	2	3	2	2	1	2	1	0
9.5	18	1.5	17	0	1	2	2	1	2	3	2	2	2	1
10.5	18	0.5	18	1	1	1	2	3	2	2	1	2	2	1	0
7.5	11	1.5	19	0	1	1	2	1	1	2	1	2	0
7.5	14	0.5	20	1	1	1	3	3	2	2	1	0
8.5	16	1.5	21	0	1	2	2	2	2	2	2	2	1	0
6.5	14	1.5	22	0	1	2	2	3	2	2	2
5.5	12	2.5	23	0	0	2	2	2	3	2	1	0
2.5	6	1.5	24	0	1	3	2
8.08333	14.4583	1.54167	SUM	4	22	37	45	43	46	45	32	33	21	11	4	3	1	0	0	0	0	0	0	0
			STDEV	0.380693	0.583592	0.58823	0.612372	0.757049	0.683763	0.485727	0.601585	0.805682	0.873212	0.688737	0.534522	0.547723	0.57735
																					5	1
																					6	1
																					8	1
																					9	2
																					10	3
																					11	3
																					12	5
																					13	3
																					14	2
																					15	2
																					16	1

## Sheet: 5at%
Reproperiod	LTF	AFR	well/day	1	2	3	4	5	6	7	8	9	10	11	12	13	14	15	16	17	18	19	20	21	22	23	24
17.5	16	2.5	1	0	0	2	0	1	2	1	2	0	1	0	1	1	1	0	1	0	1	1	1	0
10.5	8	2.5	2	0	0	1	1	1	1	1	0	1	0	1	0	1	0
18.5	19	2.5	3	0	0	1	2	1	0	2	0	2	1	2	1	1	1	0	1	1	0	1	0	1	1	0
12.5	16	2.5	4	0	0	1	2	2	2	2	2	1	1	0	0	1	1	1
10.5	11	2.5	5	0	0	2	0	1	2	1	1	1	0	1	1	1
13.5	18	0.5	6	1	0	2	2	1	0	2	3	2	1	2	0	1	1	0
14.5	19	2.5	7	0	0	1	1	2	2	3	2	1	2	1	1	1	0	1	0	1
1.5	3	2.5	8	0	0	1	2
14.5	14	3.5	9	0	0	0	1	1	2	2	1	1	0	1	1	1	0	1	0	1	1	0	0
7.5	10	2.5	10	0	0	1	2	1	0	2	1	1	2
16.5	16	2.5	11	0	0	1	2	1	1	0	2	1	1	2	1	1	0	1	0	1	0	1	0
3.5	8	1.5	12	0	1	2	3	2
8.5	11	2.5	13	0	0	1	2	1	1	2	0	2	1	1	0
7.5	11	2.5	14	0	0	1	2	2	1	3	1	0	1	0
3.5	5	2.5	15	0	0	1	1	2	1
15.5	15	2.5	16	0	0	2	2	1	2	1	1	1	0	1	0	1	1	0	1	0	1
8.5	14	3.5	17	0	0	0	2	1	2	3	2	2	1	0	1
15.5	19	2.5	18	0	0	1	1	3	1	2	2	1	2	1	1	0	1	1	0	1	1
6.5	10	2.5	19	0	0	1	2	2	2	1	1	1	0
8.5	8	0.5	20	1	1	1	0	2	1	0	1	1	0	0
13.5	28	3.5	21	0	0	0	2	1	2	2	3	2	2	0	3	2	2	3	2	2
0.5	1	1.5	22	0	1
3.5	8	2.5	23	0	0	1	2	3	2	0	0
1.5	3	1.5	24	0	1	2
9.75	12.125	2.33333	SUM	2	4	26	34	32	27	30	25	21	16	13	11	12	8	8	5	7	4	3	1	1	1	0	0
			STDEV	0.28233	0.380693	0.625543	0.800433	0.679636	0.74516	0.961237	0.945905	0.618347	0.758395	0.75	0.801784	0.426401	0.64667	0.918937	0.744024	0.64087	0.516398	0.5	0.5	0.707107
